# Supplementary material
Source: PubMed Central journal article supplement (PMC9379550)
Supplement: EMBJ-41-e110581-s002.pdf [file EMBJ-41-e110581-s002.pdf]

## APPENDIX

|                                                                                    |              |
|------------------------------------------------------------------------------------|--------------|
| <b>Table of contents</b> .....                                                     | <b>1</b>     |
| Appendix Figure S1. Classification of HCV IRES-containing ribosomal complexes..... | <b>2</b>     |
| Appendix Figure S2. Local resolution of complexes.....                             | <b>4</b>     |
| Appendix Figure S3. Example densities.....                                         | <b>6</b>     |
| Appendix Figure S4. eIF5B related complexes.....                                   | <b>8</b>     |
| Appendix Table S1. Sample composition.....                                         | <b>10</b>    |
| Appendix Table S2. Data collection statistics.....                                 | <b>11</b>    |
| Appendix Table S3. Refinement and validation statistics.....                       | <b>12-13</b> |
| Appendix Table S4. Contacts between the HCV IRES and 40S subunit.....              | <b>14</b>    |
| Appendix Table S5. Maps showing HCV IRES domain II movement.....                   | <b>15</b>    |
| Appendix Table S6. Contacts between eIF5B and the 40S subunit.....                 | <b>16</b>    |
| Appendix Table S7. Additional maps produced during data processing.....            | <b>17</b>    |

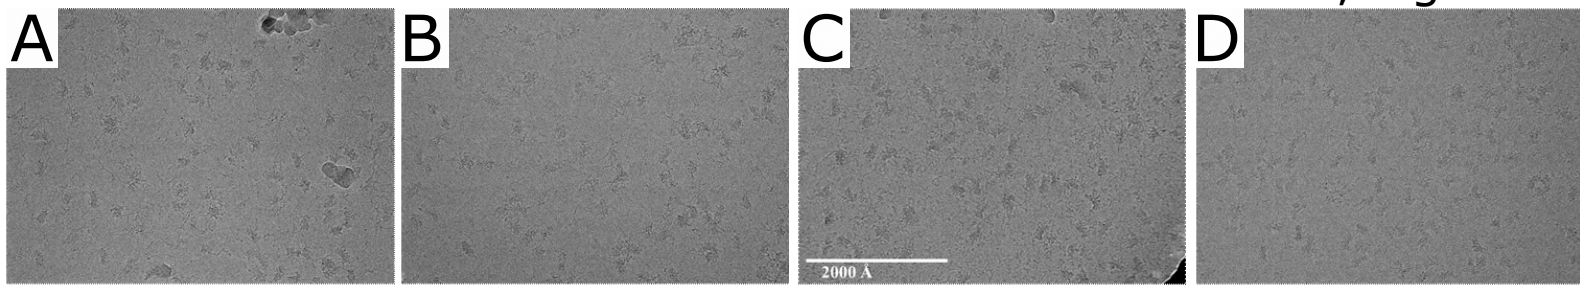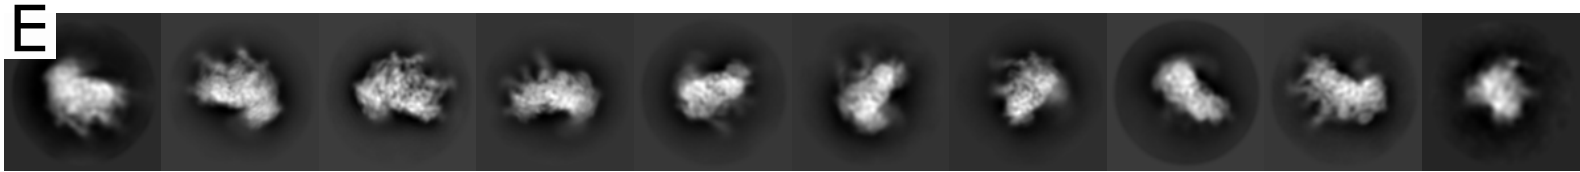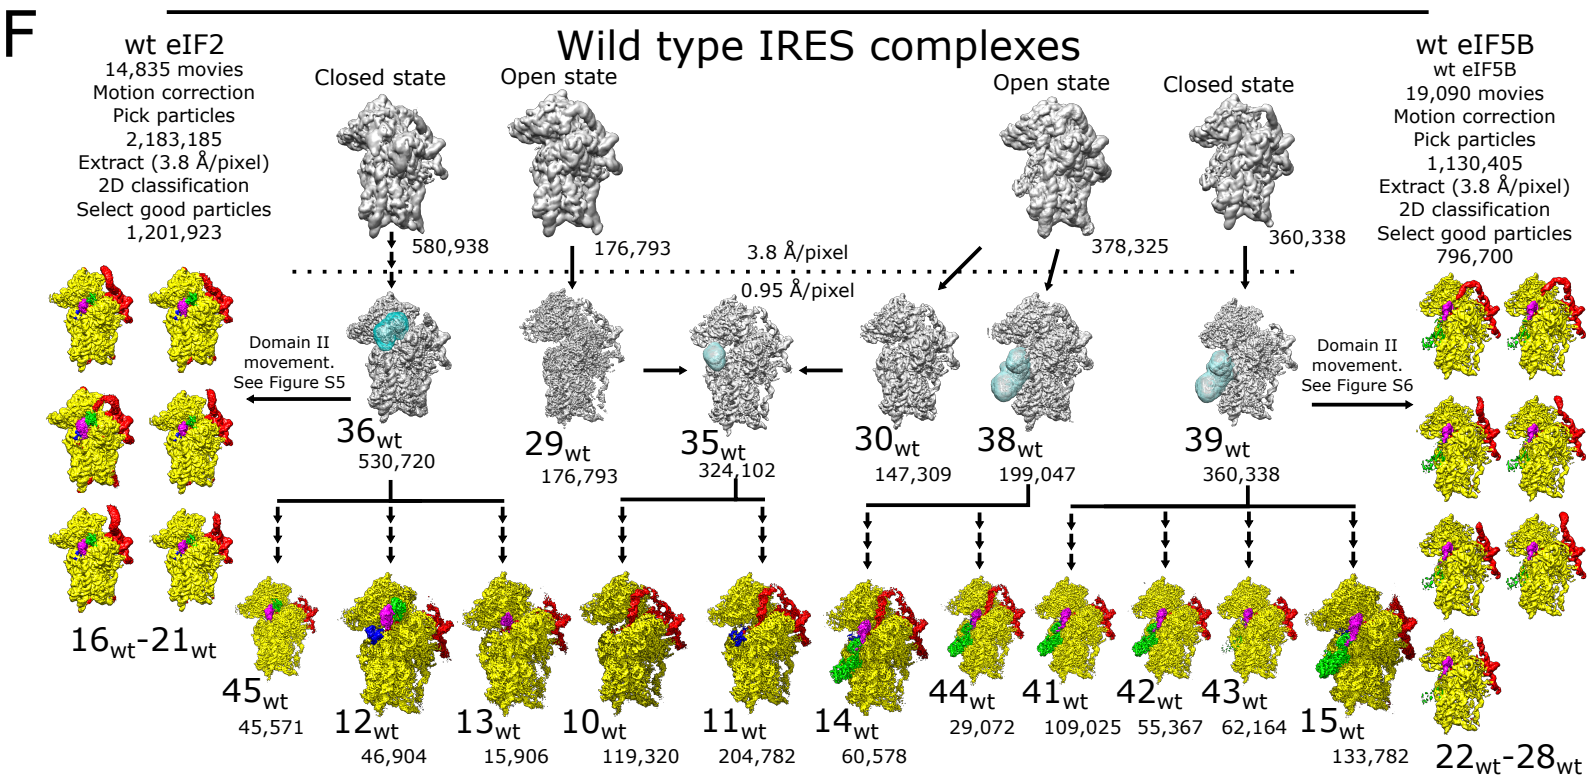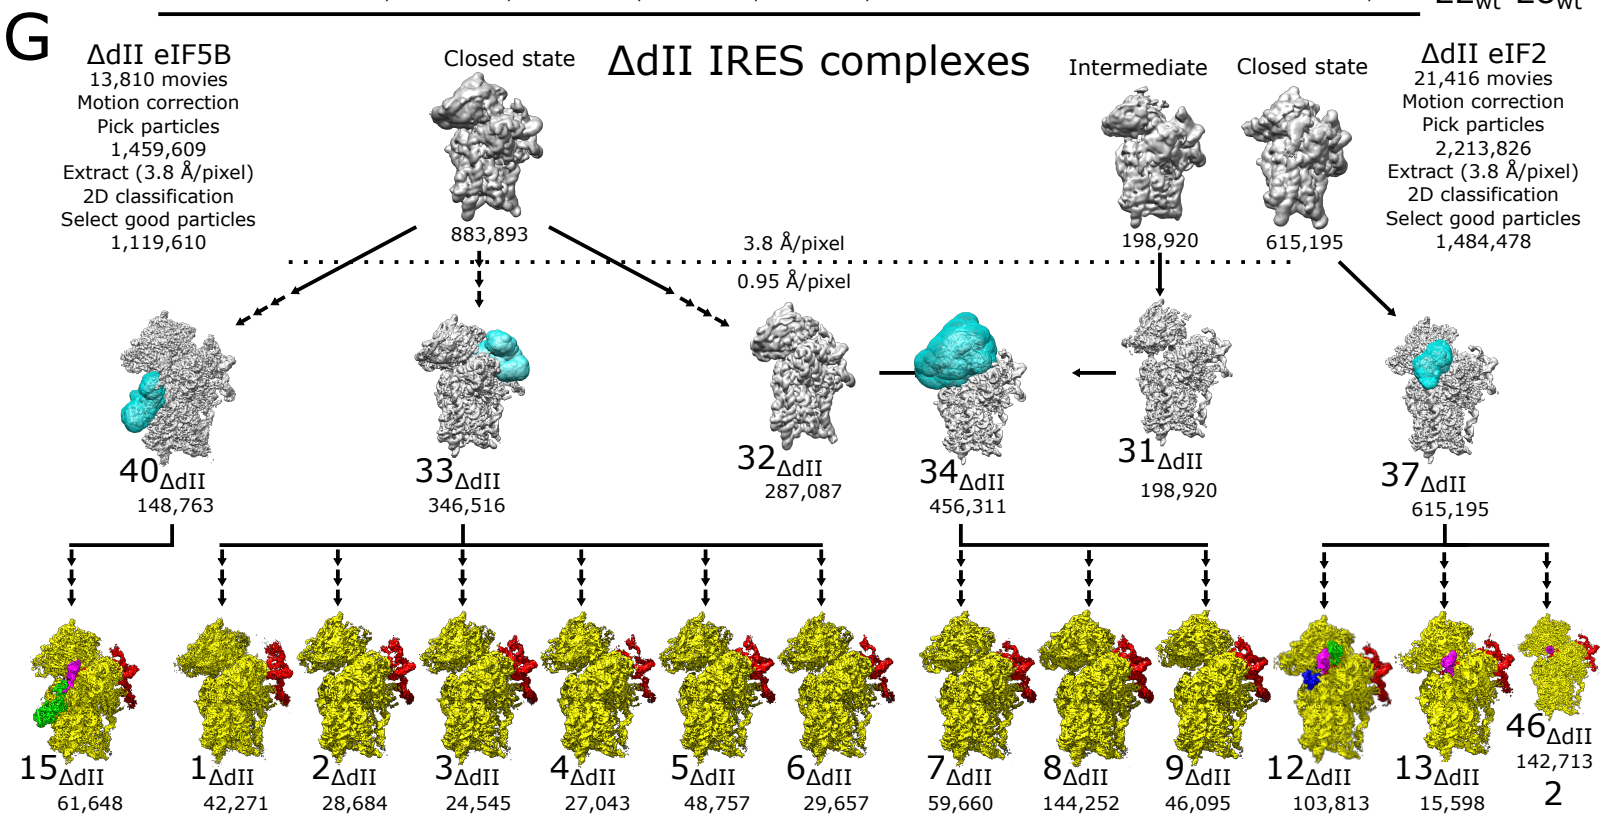

**Figure S1. Classification of HCV IRES-containing ribosomal complexes.**

(A-D) Example micrographs for (A) the *wt* IRES/eIF2-containing, (B) the *wt* IRES/eIF5B-containing, (C) the  $\Delta$ dII IRES/eIF2-containing, and (D) the  $\Delta$ dII IRES/eIF5B-containing samples. Further details are in Table S2. Scale bar is 2000 Å.

(E) Example 2D classification results for the *wt* IRES/eIF2-containing sample.

(F-G) Classification scheme for (F) *wt* and (G)  $\Delta$ dII IRES-containing samples. For full details regarding classification see Methods. Final maps are colored showing the 40S subunit (yellow), IRES (red), eIF1A (blue), Met-tRNA<sub>i</sub><sup>Met</sup> (magenta), and initiation factors eIF2 or eIF5B (green). Full details for complexes are available in Table S3 (structures 1 $\Delta$ dII-15<sub>wt/ $\Delta$ dII</sub>), Table S5 (16<sub>wt</sub>-28<sub>wt</sub>), and Table S7 (structures 29<sub>wt</sub>-46 $\Delta$ dII).

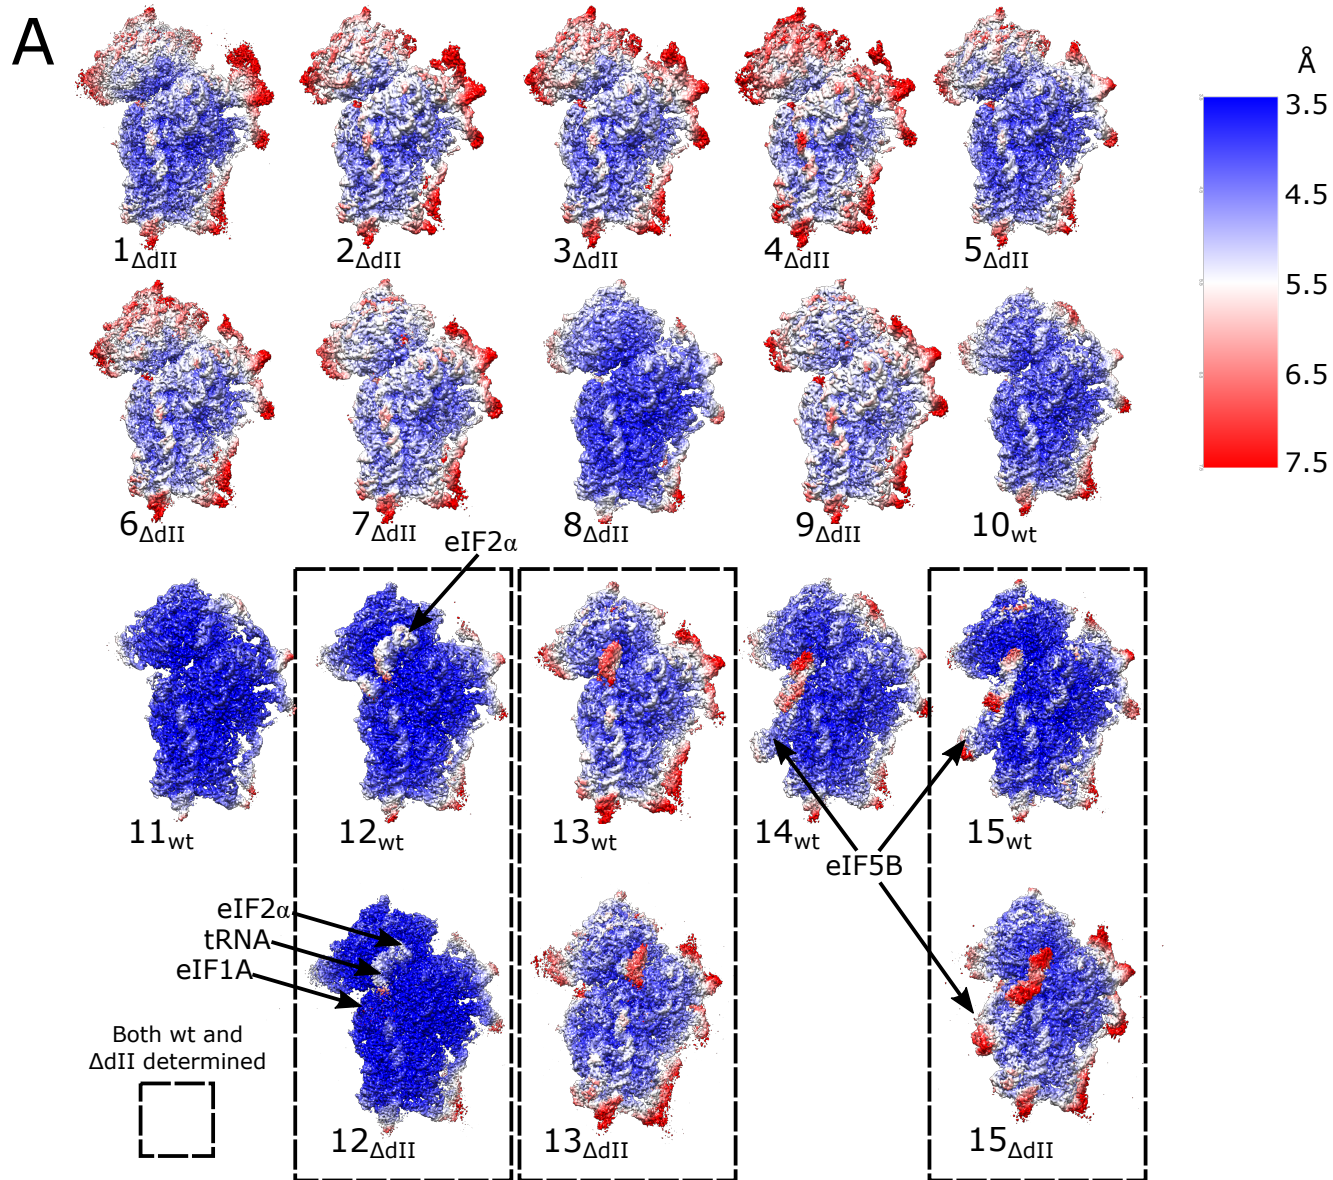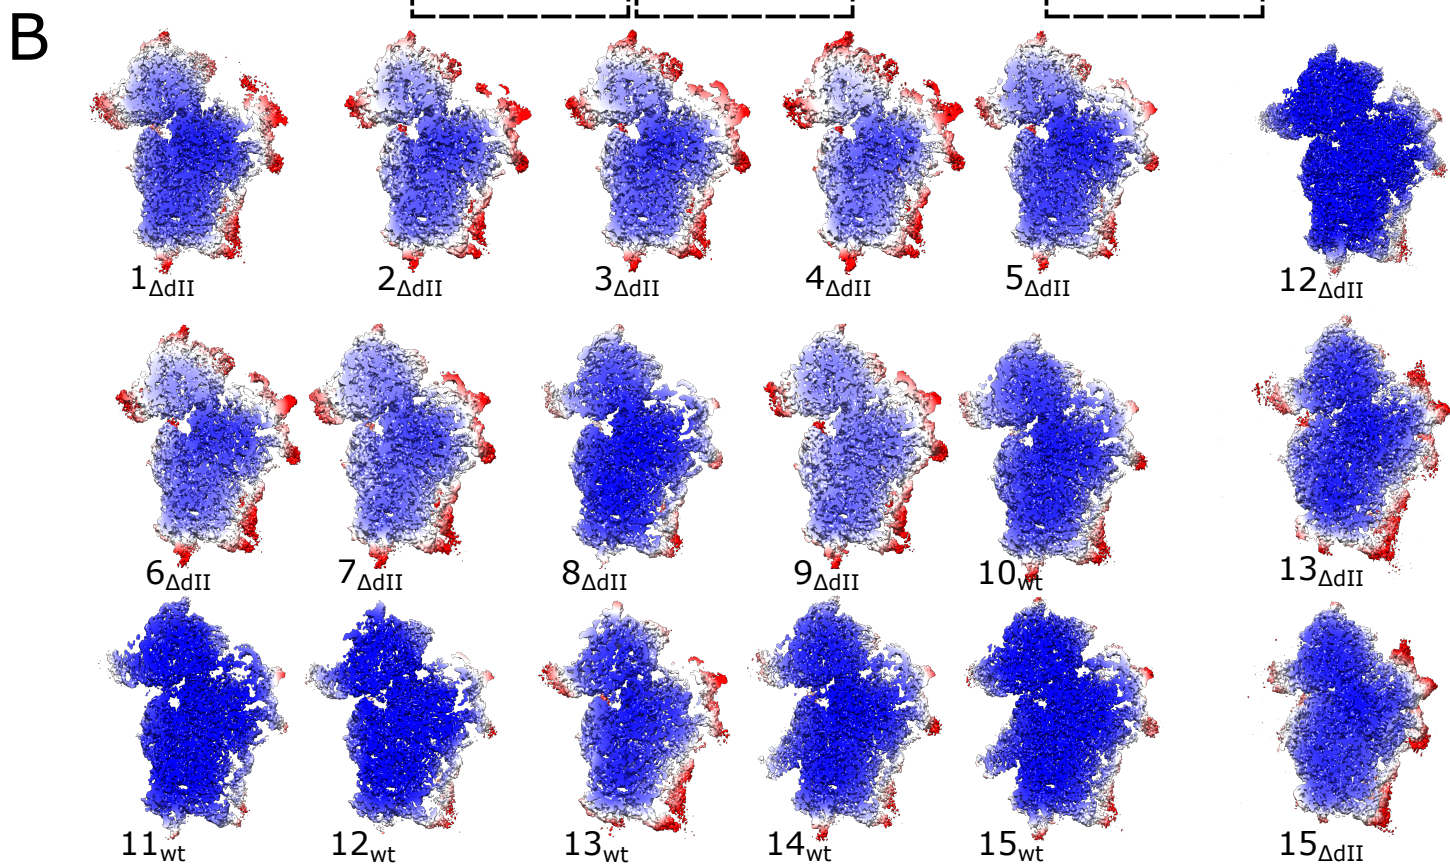

**Figure S2. Local resolution of complexes.**

**(A)** Local resolution of the indicated HCV IRES complexes.

**(B)** Central slice of each complex.

Local resolution values and filtered maps can be found under EMDB accession codes for each structure (see Table S3).

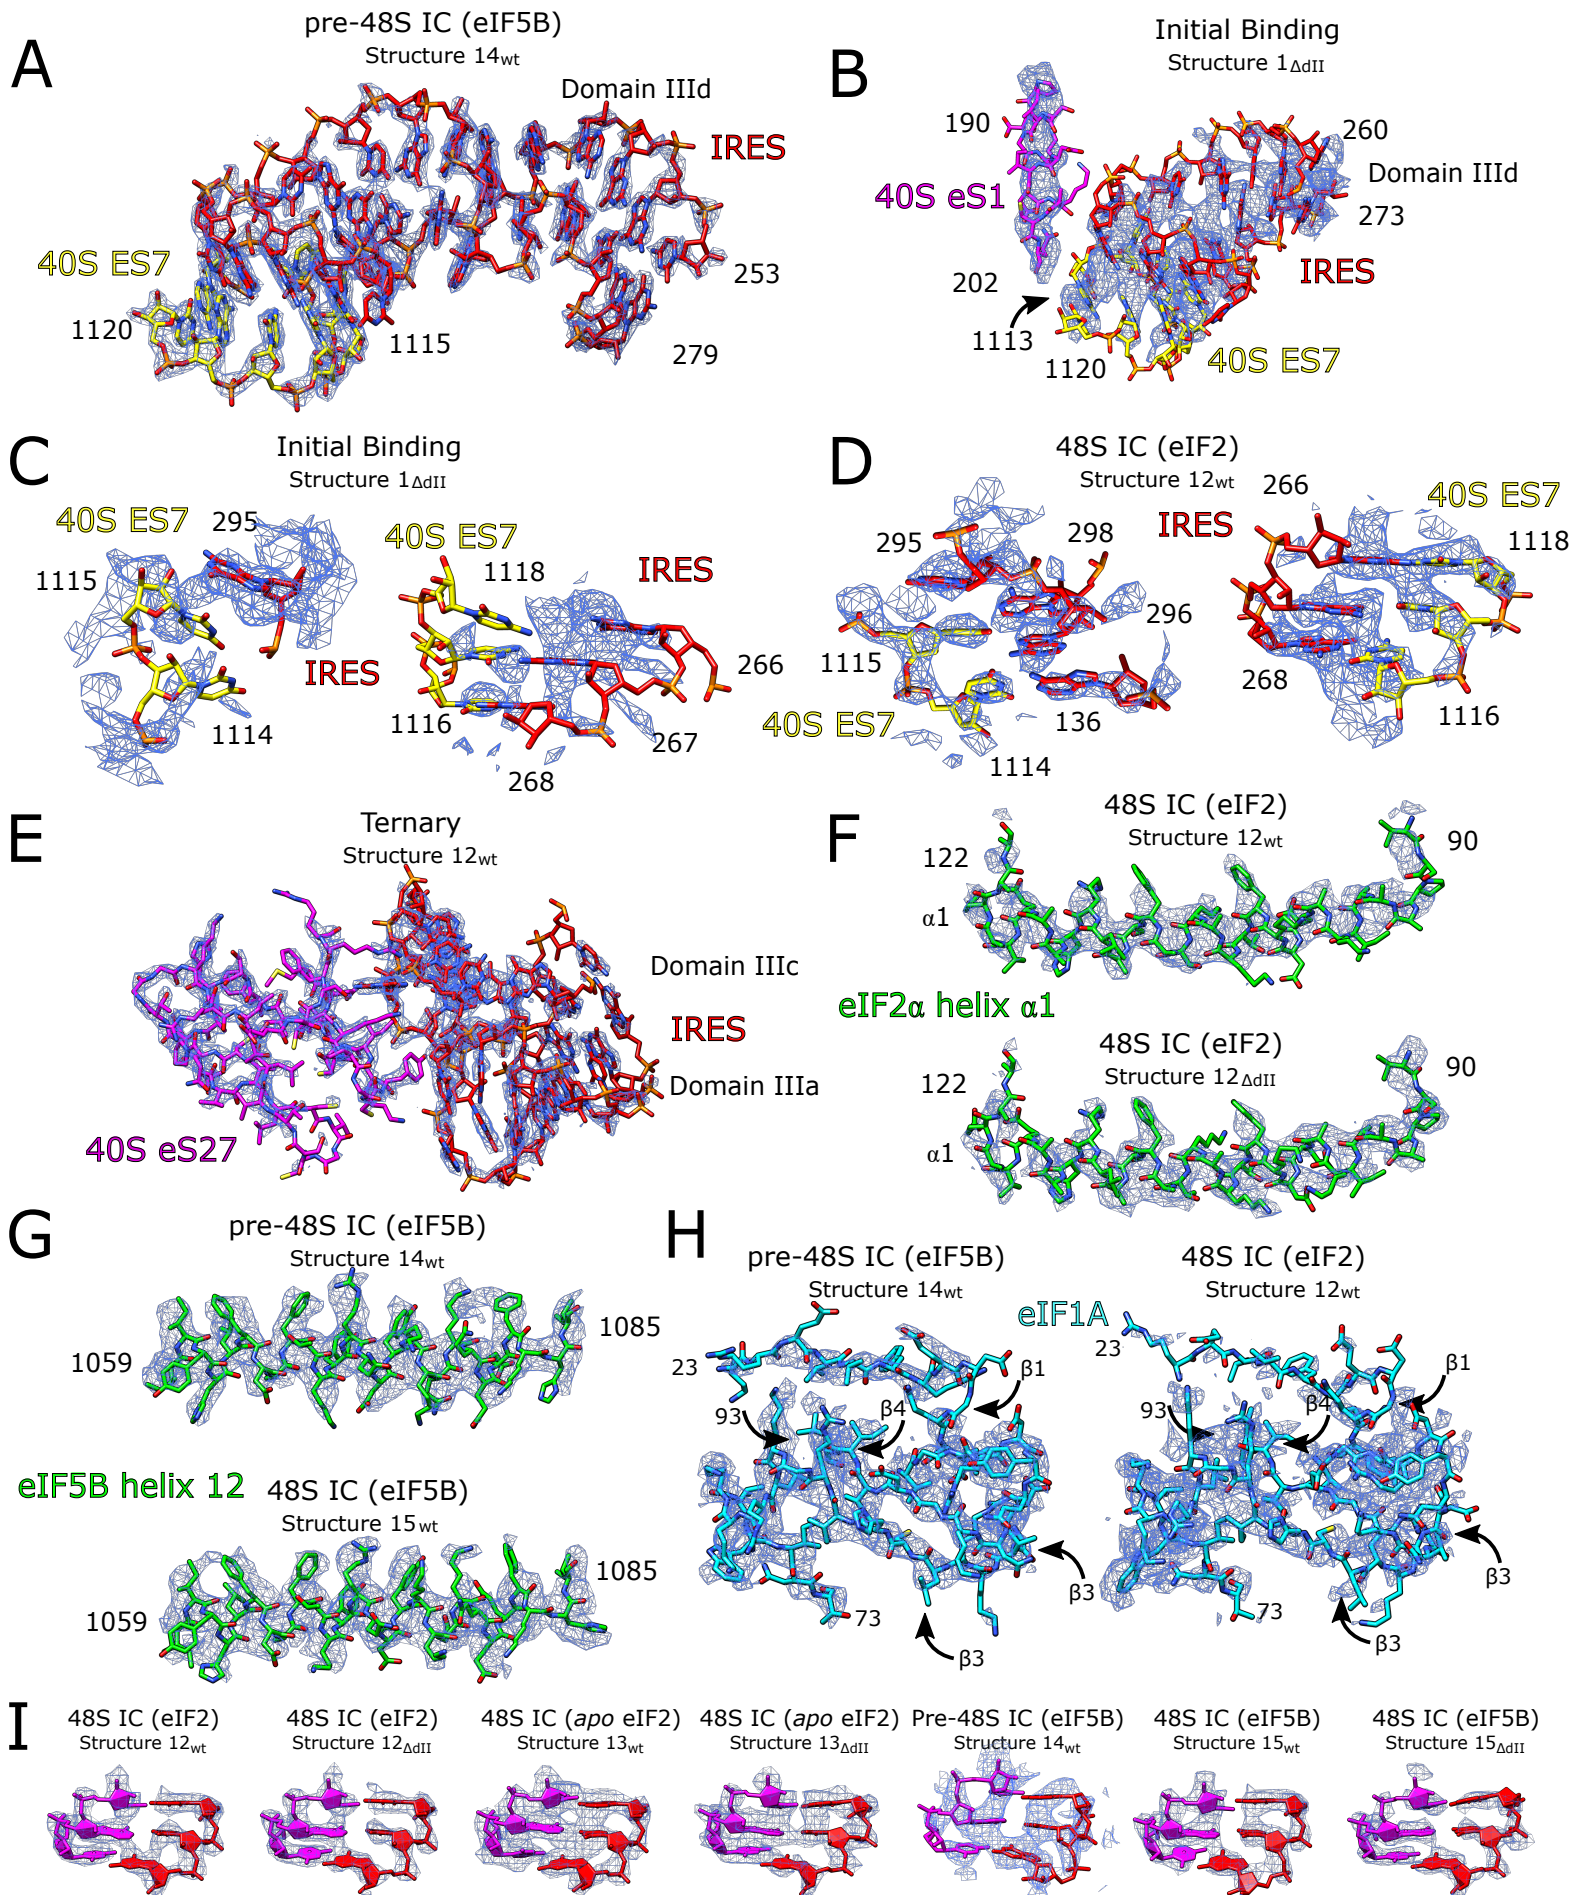

**Figure S3. Example densities.**

(A) Domain III<sub>d</sub> (red) and ES7 (yellow) for the pre-48S IC (structure 14<sub>wt</sub>).

(B) Domain III<sub>d</sub> (red) and ES7 (yellow) for the minimally bound complex (structure 1<sub>ΔdII</sub>).

(C) ES7 and IRES domain III<sub>d</sub> for the minimally bound complex (structure 1<sub>ΔdII</sub>).

(D) ES7 and IRES domain III<sub>d</sub> for the 48S IC (structure 12<sub>wt</sub>).

(E) Contact between domain III<sub>a</sub>/III<sub>c</sub> (red) and riboprotein eS27 (magenta) in the ternary complex (structure 12<sub>wt</sub>).

(F) eIF2 α-helix 1 in the *wt* IRES 48S IC (structure 12<sub>wt</sub>), top, and the ΔdII IRES 48S IC (structure 12<sub>ΔdII</sub>), bottom.

(G) eIF5B α-helix 12 in the eIF5B-containing pre-48S IC (structure 14<sub>wt</sub>), top, and the 48S IC (structure 15<sub>wt</sub>), bottom.

(H) eIF1A example densities from the eIF5B-containing pre-48S IC (structure 14<sub>wt</sub>), left, and the eIF2-containing 48S IC (structure 12<sub>wt</sub>), right.

(I) Initiation codon (red) and tRNA anticodon (magenta) for all complexes where mRNA is present in the P site. Diagram shows identity of nucleotides and hydrogen bonds for tRNA and initiation codon bases in each accompanying figure.

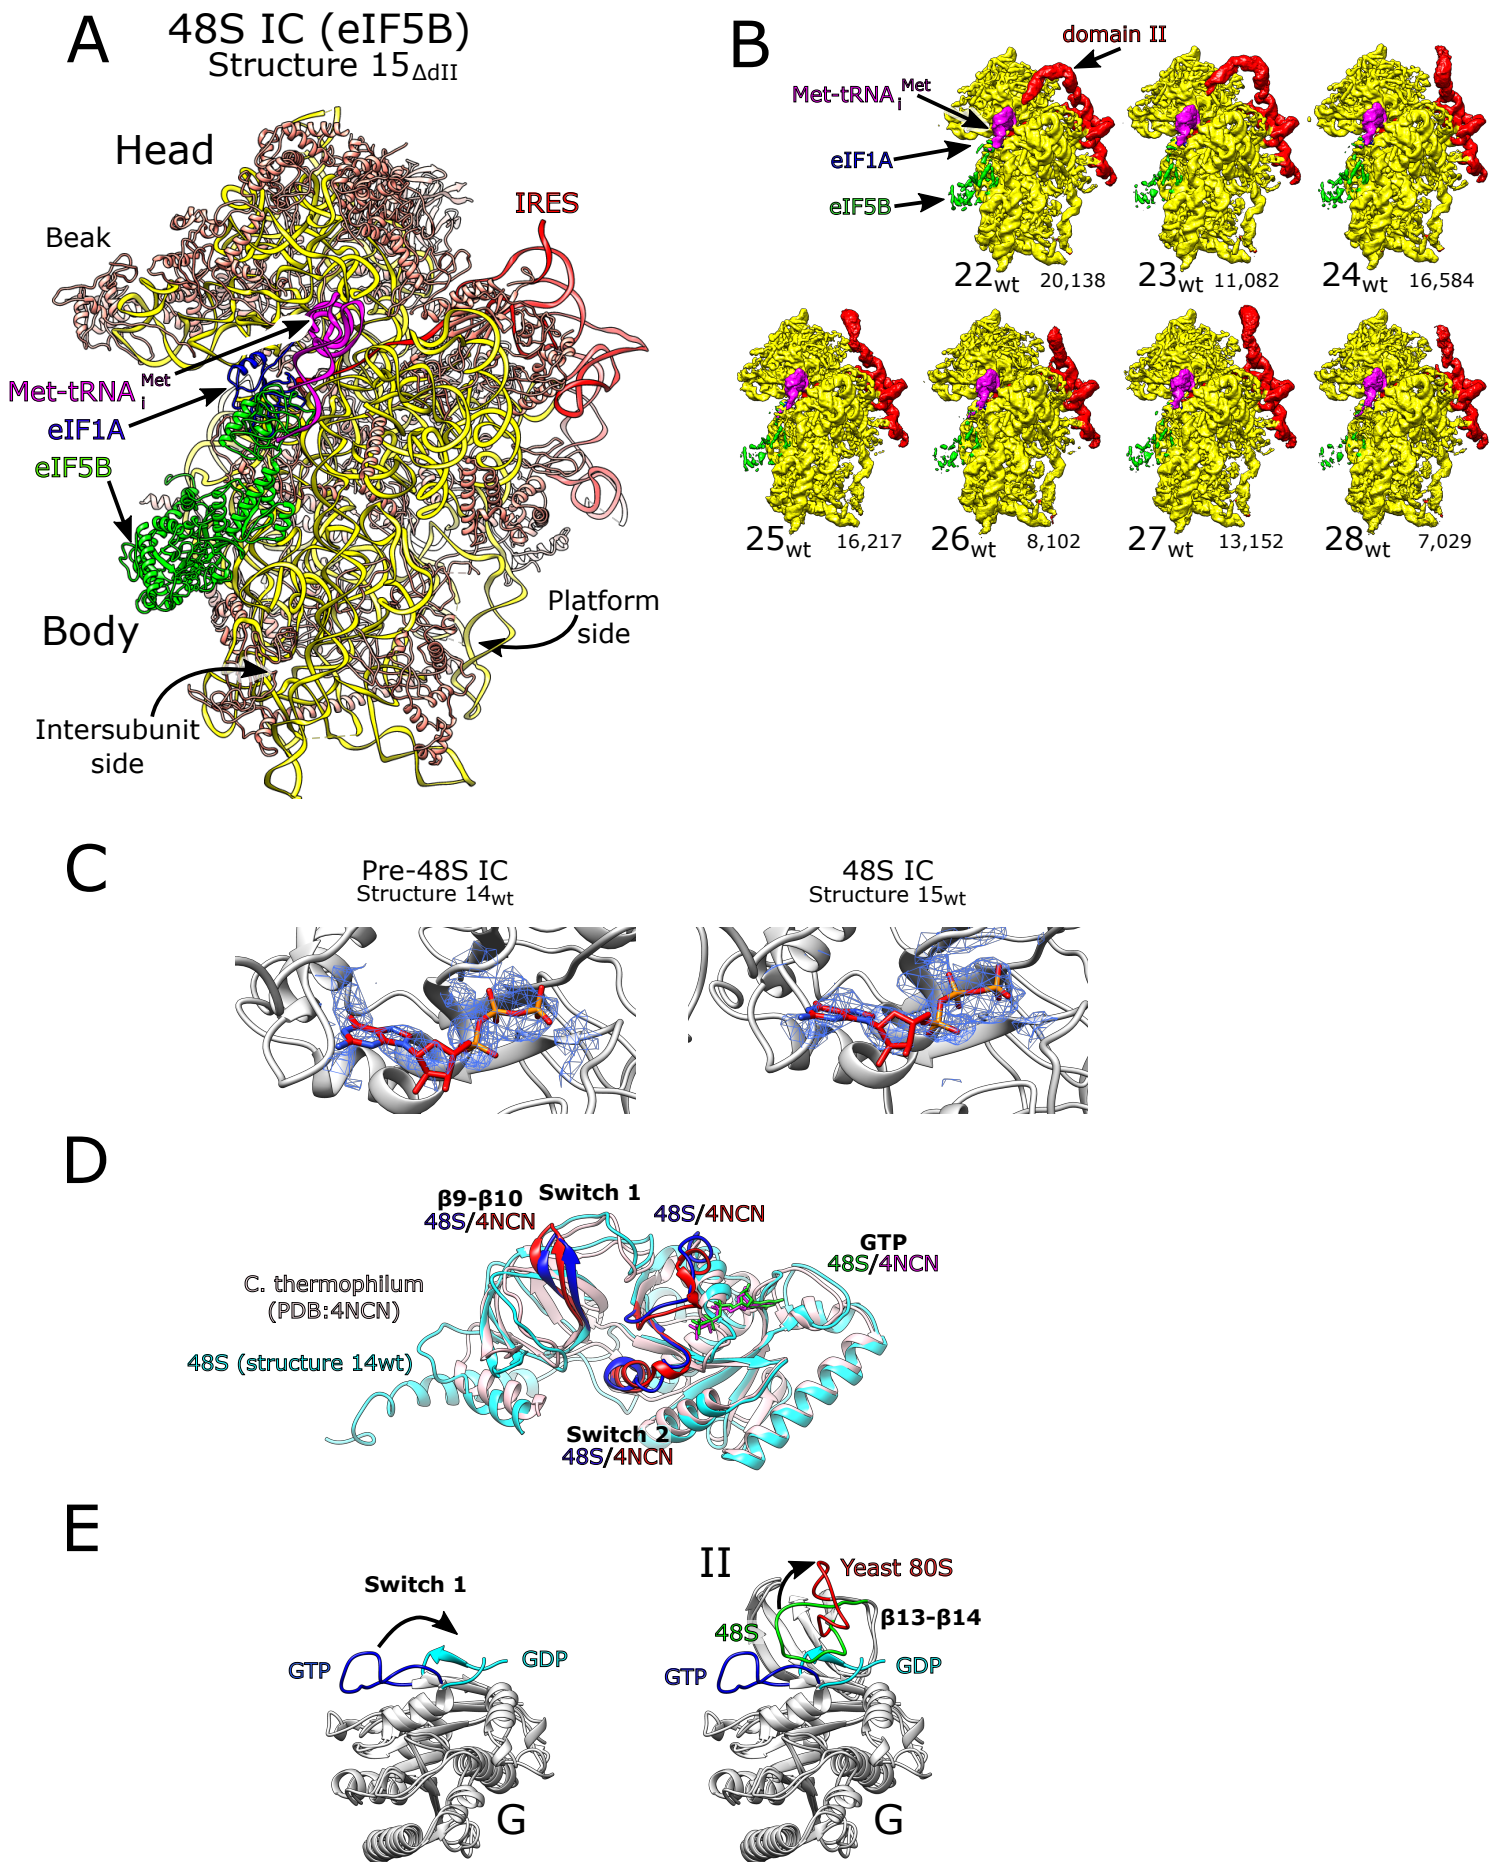



**Figure S4. eIF5B related complexes.**

(A) Overview of the  $\Delta$ dII IRES eIF5B-containing 48S initiation complex (structure 15 $_{\Delta$ dII).

(B) Maps showing that domain II occupies multiple positions in the *wt* IRES eIF5B-containing 48S IC.

(C) Coulomb potential for the GTP nucleotide in eIF5B G domain for pre-48S IC (structure 14 $_{wt}$ ), left, and 48S IC (structure 15 $_{wt}$ ), right.

(D) Comparison of the conformations of switch 1, switch 2 and the  $\beta$ 9- $\beta$ 10 loop of GTP-bound *O. cuniculus* eIF5B in the pre-48S IC (structure 14 $_{wt}$ ) (cyan) with corresponding elements of GTP-bound eIF5B from *C. thermophilum* (PDB: 4NCN) (light pink). Switch 1, switch 2 and the  $\beta$ 9- $\beta$ 10 loop are labelled and colored for *O. cuniculus* (blue) and *C. thermophilum* (red). The GTP nucleotides bound to eIF5B from *O. cuniculus* and *C. thermophilum* are green and magenta, respectively.

(E) Repositioning of the  $\beta$ 13-  $\beta$ 14 loop in domain II of eIF5B in 80S compared to 40S ribosomal complexes. (*Left*) The GTP-bound G domain of *O. cuniculus* eIF5B (structure 14 $_{wt}$ ) aligned with the GDP-bound *C. thermophilum* eIF5B (PDB: 4NCL) with switch 1 colored blue or cyan, respectively. (*Right*) Domain II of GTP-bound *O. cuniculus* eIF5B in pre-48S ICs (structure 14 $_{wt}$ ) aligned with domain II of GTP-bound yeast eIF5B in 80S ribosomes (PDB: 6WOO) with the  $\beta$ 13- $\beta$ 14 loop colored green or red, respectively. Notably, the position of the  $\beta$ 13-  $\beta$ 14 loop in 40S complexes (green) would interfere with transition of switch 1 from GTP-bound (blue) to GDP-bound (cyan) conformations.

**Table S1. Sample composition.**

| IRES                                 | Wild type | Wild type | $\Delta$ dII | $\Delta$ dII |
|--------------------------------------|-----------|-----------|--------------|--------------|
| Ternary Complex                      | eIF2      | eIF5B     | eIF2         | eIF5B        |
| 40S small subunit                    | 3.5 pmol  | 3.5 pmol  | 3.5 pmol     | 3.5 pmol     |
| Met-tRNA <sub>i</sub> <sup>Met</sup> | 3.5 pmol  | 3.5 pmol  | 3.5 pmol     | 3.5 pmol     |
| eIF2                                 | 6 pmol    | -         | 6 pmol       | -            |
| eIF5B                                | -         | 10 pmol   | -            | 10 pmol      |
| eIF3                                 | 4.5 pmol  | 4.5 pmol  | 4.5 pmol     | 4.5 pmol     |
| eIF1A                                | 10 pmol   | 10 pmol   | 10 pmol      | 10 pmol      |
| wt HCV IRES                          | 7 pmol    | 7 pmol    | -            | -            |
| $\Delta$ dII HCV IRES                | -         | -         | 7 pmol       | 7 pmol       |

**Table S2. Data collection statistics.**

|                                        |            |            |              |              |
|----------------------------------------|------------|------------|--------------|--------------|
| IRES                                   | Wild type  | Wild type  | $\Delta$ dII | $\Delta$ dII |
| Ternary Complex                        | eIF2       | eIF5B      | eIF2         | eIF5B        |
| Electron microscope                    | Polara F30 | Polara F30 | Polara F30   | Polara F30   |
| Magnification                          | 52,000     | 52,000     | 52,000       | 52,000       |
| Detector                               | K3 Summit  | K3 Summit  | K3 Summit    | K3 Summit    |
| Pixel size (Å)                         | 0.95       | 0.95       | 0.95         | 0.95         |
| Voltage (kV)                           | 300        | 300        | 300          | 300          |
| Electron exposure (e-/Å <sup>2</sup> ) | 70.9       | 70.9       | 70.9         | 70.9         |
| Defocus range (μm)                     | 1-2.5      | 1-2.5      | 1-2.5        | 1-2.5        |
| Symmetry imposed                       | C1         | C1         | C1           | C1           |
| Total collection sessions              | 2          | 4          | 3            | 2            |
| Total micrographs                      | 14,815     | 27,263     | 22,735       | 13,809       |
| No. collected at 30° tilt              | 14,815     | 20,509     | 17,695       | 13,809       |
| Initial no. picked particles           | 2,183,185  | 1,133,335  | 2,213,826    | 1,459,609    |
| Initial particles per micrograph       | 147        | 42         | 97           | 106          |
| Particles after 2D classification      | 1,201,923  | 736,700    | 1,484,658    | 1,119,610    |
| After 2D per micrograph                | 81         | 36         | 84           | 81           |

**Table S3. Refinement and validation statistics.**

| Structure                 | 1ΔdII      | 2ΔdII      | 3ΔdII      | 4ΔdII      | 5ΔdII      | 6ΔdII      | 7ΔdII      | 8ΔdII      | 9ΔdII      | 10wt       | 11wt       | 12wt          | 12ΔdII        | 13wt              | 13ΔdII            | 14wt               | 15wt           | 15ΔdII         |
|---------------------------|------------|------------|------------|------------|------------|------------|------------|------------|------------|------------|------------|---------------|---------------|-------------------|-------------------|--------------------|----------------|----------------|
| IRE5                      | ΔdII       | wt         | wt         | wt            | ΔdII          | wt                | ΔdII              | wt                 | wt             | ΔdII           |
| name                      |            |            |            |            |            |            |            |            |            | Binary     | Ternary    | 48S IC (eIF2) | 48S IC (eIF2) | 48S IC (w/o eIF2) | 48S IC (w/o eIF2) | pre-48S IC (eIF5B) | 48S IC (eIF5B) | 48S IC (eIF5B) |
| EMD                       | 25527      | 25528      | 25529      | 25530      | 25531      | 25532      | 25533      | 25534      | 25535      | 25536      | 25537      | 25538         | 25539         | 25540             | 25541             | 25542              | 25543          | 25544          |
| PDB                       | 7SYG       | 7SYH       | 7SYI       | 7SYJ       | 7SYK       | 7SYL       | 7SYM       | 7SYN       | 7SYO       | 7SYP       | 7SYQ       | 7SYR          | 7SYS          | 7SYT              | 7SYU              | 7SYV               | 7SYW           | 7SYX           |
| <b>Reconstruction</b>     |            |            |            |            |            |            |            |            |            |            |            |               |               |                   |                   |                    |                |                |
| Particles                 | 42,271     | 28,684     | 24,545     | 27,043     | 48,757     | 29,657     | 59,660     | 144,252    | 46,095     | 119,320    | 204,782    | 46,904        | 103,813       | 15,598            | 15,906            | 60,578             | 133,782        | 49,524         |
| Map resolution (Å)        | 4.3        | 4.6        | 4.5        | 4.8        | 4.2        | 4.5        | 4.8        | 4.0        | 4.6        | 3.8        | 3.8        | 3.6           | 3.5           | 4.4               | 4.6               | 3.8                | 3.7            | 3.7            |
| FSC threshold             | 0.143      | 1.143      | 2.143      | 3.143      | 4.143      | 5.143      | 6.143      | 7.143      | 8.143      | 9.143      | 10.143     | 11.143        | 12.143        | 13.143            | 14.143            | 15.143             | 16.143         | 17.143         |
| Map resolution range      | 3.65-22.06 | 3.74-27.01 | 3.74-23.97 | 3.88-35.75 | 3.64-19.89 | 3.77-22.88 | 3.89-31.38 | 3.47-21.68 | 4.10-22.32 | 3.44-24.85 | 3.31-21.92 | 3.14-19.71    | 3.00-26.78    | 3.64-30.36        | 3.56-32.65        | 3.42-19.24         | 3.27-50.00     | 3.26-17.65     |
| <b>Refinement</b>         |            |            |            |            |            |            |            |            |            |            |            |               |               |                   |                   |                    |                |                |
| Model resolution (Å)      | 4.4        | 4.8        | 4.7        | 4.8        | 4.5        | 4.8        | 4.6        | 4.0        | 4.8        | 4.1        | 3.9        | 3.8           | 3.4           | 4.7               | 4.3               | 3.9                | 3.8            | 4.2            |
| FSC threshold             | 0.5        | 1.5        | 2.5        | 3.5        | 4.5        | 5.5        | 6.5        | 7.5        | 8.5        | 9.5        | 10.5       | 11.5          | 12.5          | 13.5              | 14.5              | 15.5               | 16.5           | 17.5           |
| Map sharpening factor     | -103.01    | -113.25    | -93.88     | -102.84    | -104.30    | -101.41    | -142.94    | -128.11    | -138.92    | -111.66    | -114.32    | -81.81        | -83.72        | -101.78           | -76.23            | -74.85             | -89.27         | -57.82         |
| <i>Model composition:</i> |            |            |            |            |            |            |            |            |            |            |            |               |               |                   |                   |                    |                |                |
| Chains                    | 37         | 38         | 38         | 38         | 38         | 38         | 38         | 38         | 38         | 40         | 39         | 40            | 40            | 38                | 38                | 41                 | 40             | 41             |
| Protein residues          | 4891       | 4891       | 4891       | 4891       | 4891       | 4891       | 4891       | 4891       | 4891       | 4896       | 4997       | 5177          | 5177          | 4896              | 4896              | 5644               | 5622           | 5622           |
| Nucleotides               | 1859       | 1859       | 1859       | 1859       | 1859       | 1859       | 1859       | 1859       | 1863       | 1943       | 1944       | 1960          | 1960          | 1960              | 1960              | 2019               | 1960           | 1960           |
| non-hydrogen atoms        | 78773      | 78761      | 78761      | 78761      | 78761      | 78748      | 78761      | 78761      | 78846      | 80500      | 81427      | 83005         | 82981         | 80962             | 80962             | 88186              | 86758          | 86744          |
| Ligands (Zn, Mg, GTP)     | 2, 0, 0    | 2, 0, 0    | 2, 0, 0    | 2, 0, 0    | 2, 0, 0    | 2, 0, 0    | 2, 0, 0    | 2, 0, 0    | 2, 0, 0    | 2, 0, 0    | 2, 0, 0    | 1, 0, 0       | 1, 0, 0       | 1, 0, 0           | 1, 0, 0           | 1, 2, 1            | 1, 1, 1        | 1, 1, 1        |
| <i>B factors (Å):</i>     |            |            |            |            |            |            |            |            |            |            |            |               |               |                   |                   |                    |                |                |
| Protein                   | 101.6      | 107.24     | 109.73     | 118.76     | 100.54     | 77.22      | 101.23     | 64.92      | 125.01     | 73.5       | 82.13      | 51.25         | 52.65         | 76.99             | 97.14             | 78.23              | 64.67          | 37.31          |
| RNA                       | 122.84     | 125.22     | 119.39     | 138.94     | 115.81     | 94.45      | 115.38     | 87.93      | 120.7      | 95.98      | 101.52     | 75.46         | 71.77         | 108.65            | 120.61            | 94.3               | 84.42          | 58.41          |
| <i>RMS deviations:</i>    |            |            |            |            |            |            |            |            |            |            |            |               |               |                   |                   |                    |                |                |
| Bond lengths (Å)          | 0.003      | 0.003      | 0.004      | 0.003      | 0.001      | 0.004      | 0.003      | 0.002      | 0.003      | 0.004      | 0.003      | 0.003         | 0.003         | 0.004             | 0.003             | 0.003              | 0.003          | 0.003          |
| Bond angles (°)           | 0.744      | 0.786      | 0.869      | 0.789      | 0.83       | 0.865      | 0.833      | 0.495      | 0.854      | 0.817      | 0.81       | 0.775         | 0.748         | 0.855             | 0.797             | 0.776              | 0.78           | 0.778          |
| <i>Validation:</i>        |            |            |            |            |            |            |            |            |            |            |            |               |               |                   |                   |                    |                |                |
| Molprobrity score         | 1.61       | 1.66       | 1.74       | 1.70       | 1.68       | 1.77       | 1.65       | 1.84       | 1.65       | 1.59       | 1.56       | 1.50          | 1.45          | 1.59              | 1.56              | 1.59               | 1.52           | 1.53           |

|                           |       |       |       |       |       |       |       |       |       |       |       |       |       |       |       |       |       |       |
|---------------------------|-------|-------|-------|-------|-------|-------|-------|-------|-------|-------|-------|-------|-------|-------|-------|-------|-------|-------|
| Clashscore                | 4.83  | 5.13  | 5.70  | 5.37  | 5.27  | 6.16  | 5.28  | 9.66  | 5.43  | 4.63  | 4.35  | 3.73  | 3.53  | 4.83  | 4.35  | 4.43  | 3.89  | 4.26  |
| Poor rotamers (%)         | 0     | 0.02  | 0     | 0.02  | 0.02  | 0.02  | 0     | 0     | 0.05  | 0.07  | 0.02  | 0.07  | 0.11  | 0.07  | 0.07  | 0.02  | 0.02  | 0     |
| <i>Ramachandran plot:</i> |       |       |       |       |       |       |       |       |       |       |       |       |       |       |       |       |       |       |
| Disallowed (%)            | 0.02  | 0.02  | 0.04  | 0     | 0.02  | 0.02  | 0     | 0     | 0     | 0.02  | 0.02  | 0     | 0     | 0     | 0     | 0     | 0     | 0     |
| Favoured (%)              | 94.84 | 94.23 | 93.32 | 93.90 | 94.05 | 93.38 | 94.73 | 95.25 | 94.90 | 94.84 | 95.03 | 95.16 | 95.59 | 95.05 | 95.09 | 94.61 | 95.06 | 95.39 |
| Allowed (%)               | 95.58 | 95.02 | 94.19 | 94.69 | 94.88 | 94.25 | 95.56 | 95.75 | 95.75 | 95.66 | 95.84 | 95.94 | 96.34 | 95.91 | 95.89 | 95.39 | 95.84 | 96.17 |
| <i>RNA validation:</i>    |       |       |       |       |       |       |       |       |       |       |       |       |       |       |       |       |       |       |
| Length outliers (%)       | 0.00  | 0.00  | 0.00  | 0.00  | 0.00  | 0.00  | 0.00  | 0.00  | 0.00  | 0.00  | 0.00  | 0.00  | 0.00  | 0.00  | 0.00  | 0.00  | 0.00  | 0.00  |
| Angle outliers (%)        | 0.00  | 0.00  | 0.00  | 0.00  | 0.00  | 0.00  | 0.00  | 0.00  | 0.00  | 0.00  | 0.00  | 0.00  | 0.00  | 0.00  | 0.00  | 0.00  | 0.00  | 0.00  |
| Sugar pucker outliers (%) | 0.01  | 0.00  | 0.01  | 0.01  | 0.01  | 0.01  | 0.00  | 0.01  | 0.01  | 0.01  | 0.01  | 0.01  | 0.01  | 0.01  | 0.01  | 0.01  | 0.01  | 0.01  |
| Average suit              | 0.494 | 0.495 | 0.472 | 0.482 | 0.499 | 0.462 | 0.483 | 0.519 | 0.475 | 0.510 | 0.519 | 0.546 | 0.549 | 0.519 | 0.519 | 0.520 | 0.534 | 0.535 |

**Table S4. Contacts between the HCV IRES and 40S subunit.**

| IRES Domain | No.     |     | 40S  | No.      | Res.     | 1AdII | 2AdII | 3AdII | 4AdII | 5AdII | 6AdII | 7AdII | 8AdII | 9AdII | 10wt | 11wt | 12wt | 12AdII | 13wt | 13AdII | 14wt | 15wt | 15AdII |
|-------------|---------|-----|------|----------|----------|-------|-------|-------|-------|-------|-------|-------|-------|-------|------|------|------|--------|------|--------|------|------|--------|
| II          | 68      | G   | eS25 | 78       | Lys      | no    | yes  | yes  | no   | no     | no   | no     | yes  | no   | no     |
| II          | 81      | A   | uS7  | 130, 133 | Arg, Thr | no    | yes  | yes  | no   | no     | no   | no     | yes  | no   | no     |
| II          | 83-86   | C   | uS11 | 66       | Arg      | no    | yes  | yes  | no   | no     | no   | no     | yes  | no   | no     |
| II          | 101     | U   | eS25 | 76       | Arg      | no    | yes  | yes  | no   | no     | no   | no     | yes  | no   | no     |
| hIII1       | 136     | A   | 18S  | 1115     | U        | no    | no    | no    | no    | yes   | yes   | yes   | yes   | yes   | yes  | yes  | yes  | yes    | yes  | yes    | yes  | yes  | yes    |
| IIIa        | 163/164 | G/U | eS27 | 41       | Tyr      | yes   | yes  | yes  | yes  | yes    | yes  | yes    | yes  | yes  | yes    |
| IIIc        | 233     | G   | eS27 | 43,80    | Ile,Arg  | yes   | yes  | yes  | yes  | yes    | yes  | yes    | yes  | yes  | yes    |
| III d       | 266     | G   | 18S  | 1118     | C        | no    | yes   | yes  | yes  | yes  | yes    | yes  | yes    | yes  | yes  | yes    |
| III d       | 267     | G   | 18S  | 1117     | C        | yes   | yes  | yes  | yes  | yes    | yes  | yes    | yes  | yes  | yes    |
| III d       | 268     | G   | 18S  | 1116     | C        | yes   | yes  | yes  | yes  | yes    | yes  | yes    | yes  | yes  | yes    |
| III e       | 295     | G   | 18S  | 1114     | U        | no    | no    | yes   | yes  | yes  | yes  | yes    | yes  | yes    | yes  | yes  | yes    |
| III e       | 296     | A   | 18S  | 1114     | U        | no    | no    | no    | yes   | yes   | yes   | yes   | yes   | yes   | yes  | yes  | yes  | yes    | yes  | yes    | yes  | yes  | yes    |
| III e       | 300     | G   | eS1  | 147      | Asn      | no    | no    | no    | no    | yes   | yes   | yes   | yes   | yes   | yes  | yes  | yes  | yes    | yes  | yes    | yes  | yes  | yes    |

**Table S5. Maps showing HCV IRES domain II movement.**

| Structure             | 16 <sub>wt</sub> | 17 <sub>wt</sub> | 18 <sub>wt</sub> | 19 <sub>wt</sub> | 20 <sub>wt</sub> | 21 <sub>wt</sub> | 22 <sub>wt</sub> | 23 <sub>wt</sub> | 24 <sub>wt</sub> | 25 <sub>wt</sub> | 26 <sub>wt</sub> | 27 <sub>wt</sub> | 28 <sub>wt</sub> |
|-----------------------|------------------|------------------|------------------|------------------|------------------|------------------|------------------|------------------|------------------|------------------|------------------|------------------|------------------|
| Sample:               | eIF2             | eIF2             | eIF2             | eIF2             | eIF2             | eIF2             | eIF5B            |
| EMDB                  | 25545            | 25546            | 25547            | 25548            | 25549            | 25550            | 25551            | 25552            | 25553            | 25554            | 25555            | 25556            | 25557            |
| <b>Reconstruction</b> |                  |                  |                  |                  |                  |                  |                  |                  |                  |                  |                  |                  |                  |
| Particles             | 41,393           | 39,148           | 49,034           | 66,090           | 24,190           | 36,155           | 20,138           | 11,082           | 16,584           | 16,217           | 8,102            | 13,152           | 7,029            |
| Map resolution (Å)    | 3.8              | 3.8              | 3.7              | 3.6              | 3.9              | 3.8              | 5.0              | 5.4              | 5.2              | 4.9              | 6.0              | 5.3              | 6.2              |
| FSC threshold         | 0.143            | 0.143            | 0.143            | 0.143            | 0.143            | 0.143            | 0.143            | 0.143            | 0.143            | 0.143            | 0.143            | 0.143            | 0.143            |
| Map sharpening factor | -79.90           | -90.02           | -71.72           | -86.21           | -93.54           | -82.41           | -169.5           | -144.1           | -156.7           | -120.5           | -135.7           | -108.5           | -132.1           |
| Map resolution range  | 3.2-13.1         | 3.3-13.7         | 3.2-20.2         | 3.1-14.3         | 3.4-16.4         | 3.3-14.5         | 4.3-20.6         | 4.6-21.2         | 4.4-23.8         | 4.0-42.6         | 4.4-49.0         | 4.1-23.9         | 4.5-26.3         |

**Table S6. Contacts between eIF5B and the 40S subunit.** Contacts between eIF5B in the pre-48S IC (structure 14<sub>wt</sub>), 48S IC (structure 15<sub>wt/ΔdII</sub>), or yeast eIF5B-containing 80S (PDB: 6WOO).

| Domain | no.  | res. | chain | Helix | no. | res. | 14wt | 15wt | 15ΔdII | PDB: 6WOO |
|--------|------|------|-------|-------|-----|------|------|------|--------|-----------|
| II     | 957  | GLU  | uS12  | n/a   | 142 | ARG  | yes  | no   | yes    | yes       |
| II     | 965  | ARG  | 18S   | 15    | 478 | G    | yes  | yes  | yes    | no        |
| II     | 965  | ARG  | 18S   | 15    | 488 | OP1  | yes  | yes  | yes    | yes       |
| II     | 980  | ASN  | 18S   | 5     | 50  | A    | yes  | yes  | yes    | no        |
| II     | 984  | LYS  | 18S   | 5     | 488 | U    | yes  | yes  | no     | yes       |
| II     | 999  | LYS  | 18S   | 5     | 487 | U    | yes  | yes  | yes    | yes       |
| III    | 1077 | HIS  | 18S   | 5     | 480 | OP1  | yes  | yes  | yes    | yes       |
| III    | 1078 | LYS  | 18S   | 5     | 482 | OP1  | no   | no   | no     | no        |
| III    | 1103 | ARG  | 18S   | 14    | 460 | A    | yes  | yes  | yes    | no        |
| III    | 1103 | ARG  | 18S   | 14    | 461 | U    | yes  | yes  | yes    | no        |
| III    | 1106 | ARG  | 18S   | 14    | 459 | U    | yes  | yes  | yes    | no        |



**Table S7 Additional maps produced during data processing.**

| Structure          | EMDB (PP job) | Particles | Map resolution (Å) | FSC threshold | Map sharpening factor | Note                                 |
|--------------------|---------------|-----------|--------------------|---------------|-----------------------|--------------------------------------|
| 29 <sub>wt</sub>   | 25588         | 176,793   | 3.8                | 0.143         | -132.09               | Pre-consensus (binary, eIF2)         |
| 30 <sub>wt</sub>   | 25589         | 147,309   | 4.1                | 0.143         | -113.23               | Pre-consensus (binary, eIF5B)        |
| 31 <sub>ΔdII</sub> | 25590         | 198,920   | 3.5                | 0.143         | -85.69                | Pre-consensus (head movement, eIF2)  |
| 32 <sub>ΔdII</sub> | 25591         | 287,087   | 4.5                | 0.143         | -218.18               | Pre-consensus (head movement, eIF5B) |
| 33 <sub>ΔdII</sub> | 25592         | 346,516   | 3.6                | 0.143         | -112.77               | Consensus (IRES binding)             |
| 34 <sub>ΔdII</sub> | 25593         | 456,311   | 3.5                | 0.143         | -104.49               | Consensus (head movement)            |
| 35 <sub>wt</sub>   | 25594         | 342,102   | 3.3                | 0.143         | -99.38                | Consensus (binary)                   |
| 36 <sub>wt</sub>   | 25595         | 530,720   | 3.1                | 0.143         | -114.46               | Focused (eIF2)                       |
| 37 <sub>ΔdII</sub> | 25596         | 615,195   | 3.3                | 0.143         | -108.92               | Focused (eIF2)                       |
| 38 <sub>wt</sub>   | 25597         | 199,047   | 3.6                | 0.143         | -84.45                | Focused (open, eIF5B)                |
| 39 <sub>wt</sub>   | 25598         | 360,338   | 3.4                | 0.143         | -107.37               | Focused (closed, eIF5b)              |
| 40 <sub>ΔdII</sub> | 25599         | 148,763   | 3.4                | 0.143         | -65.49                | Focused (closed, eIF5B)              |
| 41 <sub>wt</sub>   | 25600         | 109,025   | 3.7                | 0.143         | -97.61                | Closed, eIF5B                        |
| 42 <sub>wt</sub>   | 25601         | 55,367    | 3.8                | 0.143         | -89.55                | Closed, eIF5B                        |
| 43 <sub>wt</sub>   | 25602         | 62,164    | 3.9                | 0.143         | -117.14               | Closed, eIF5B                        |
| 44 <sub>wt</sub>   | 25603         | 29,072    | 4.2                | 0.143         | -70.09                | Open, eIF5B                          |
| 45 <sub>wt</sub>   | 25604         | 45,571    | 3.6                | 0.143         | -82.06                | Closed, eIF2                         |
| 46 <sub>ΔdII</sub> | 25620         | 142,713   | 3.6                | 0.143         | -104.37               | Closed, eIF2 ΔdII                    |
