# Supplementary material
Source: PubMed Central journal article supplement (PMC9379550)
Supplement: EMBJ-41-e110581-s003.pdf [file EMBJ-41-e110581-s003.pdf]

## Expanded View Figures

**Figure EV1. All HCV IRES-mediated initiation complexes.**

- A Segmented maps of the indicated 40S ribosomal complexes assembled on the *wt* or  $\Delta$ dII HCV IRES, showing the 40S subunit (yellow), IRES (red), eIF1A (blue), Met-tRNA<sup>Met</sup> (magenta), and initiation factors eIF2 (green) or eIF5B (cyan). Complexes assembled on the *wt* or  $\Delta$ dII HCV IRES that share identical 40S subunit conformation and factor composition are enclosed by dashed lines.
- B Interaction between the IRES and the 40S subunit at different stages of initiation. Contacts with ribosomal proteins (red) and 18S rRNA (yellow), and the AUG codon (blue) are marked for the indicated complexes. See Appendix Table S4 for additional information.

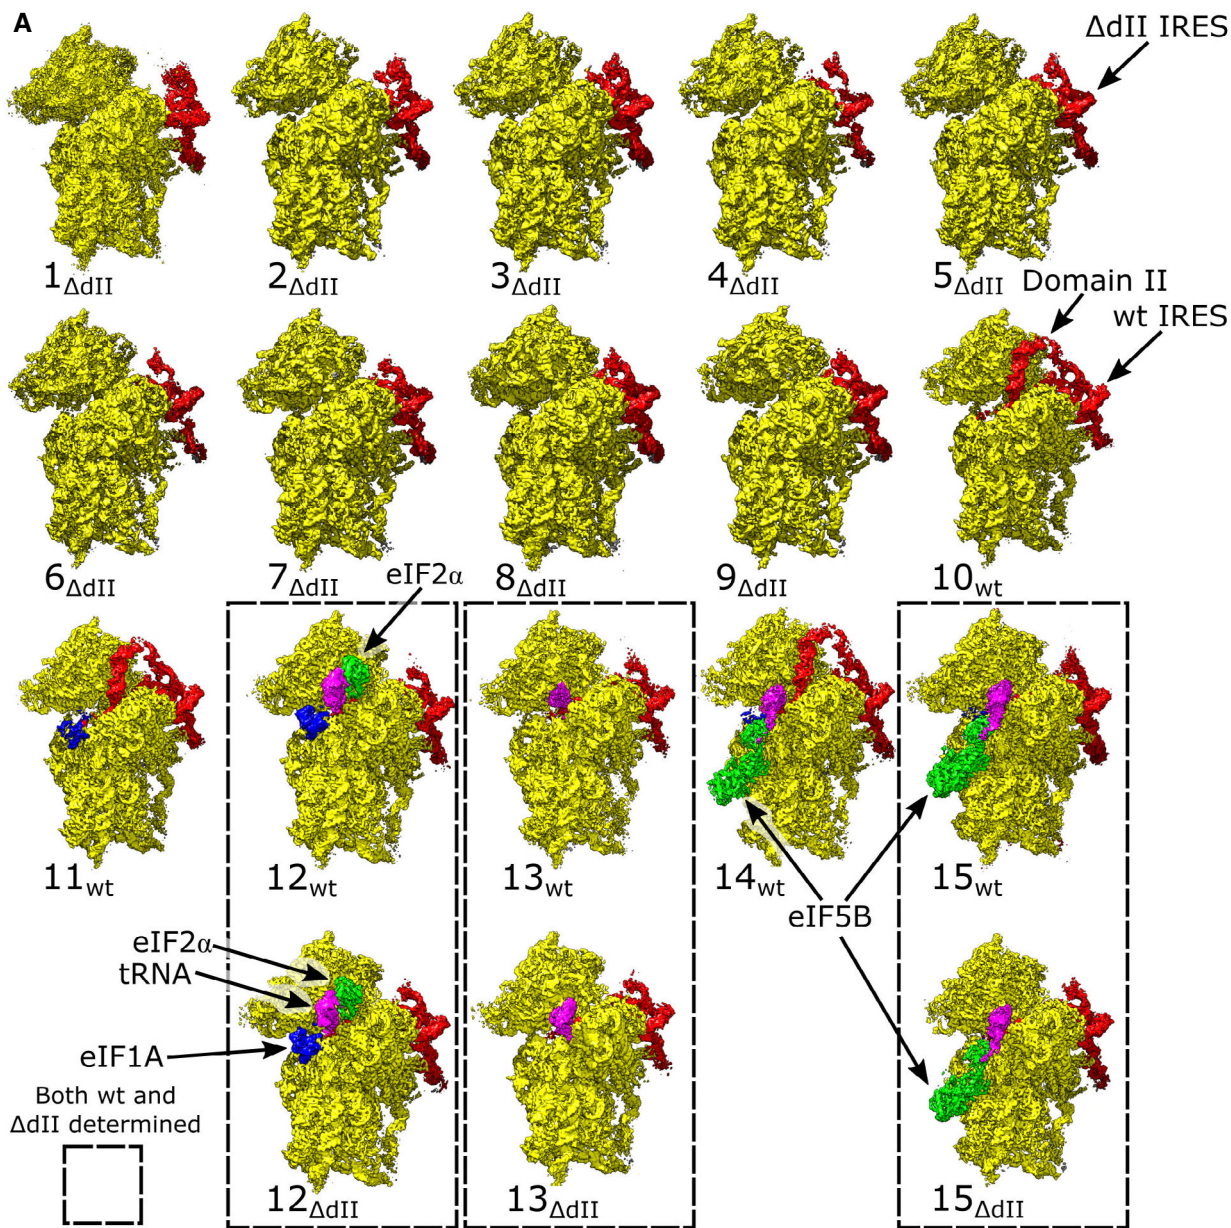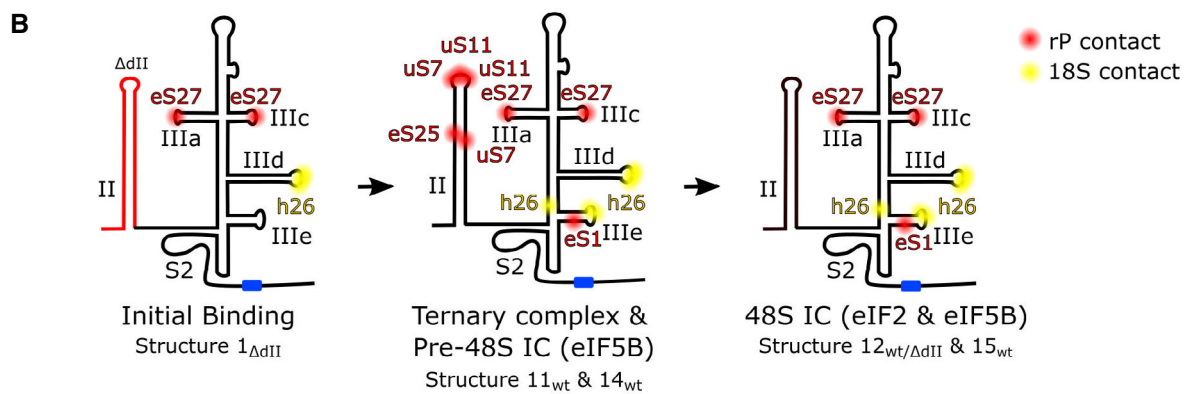

Figure EV1.

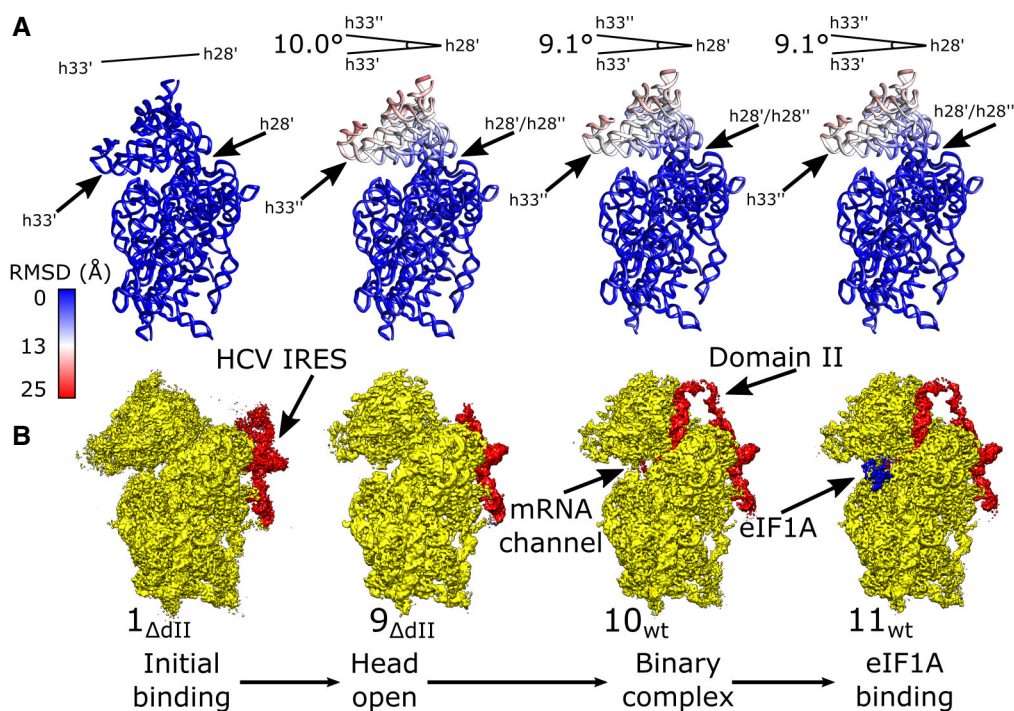

**Figure EV2. Conformational changes in the 40S subunit induced by association with the *wt* or  $\Delta$ dII HCV IRES.**

A RMSD (Å) of 18S rRNA for complexes shown directly underneath in (B) relative to the minimally bound state (structure 1<sub>ΔdII</sub>), color-coded as in the inset key. The angle formed between helix 33 (h33') and helix 28 (h28') in structure 1<sub>ΔdII</sub> and helix 33 (h33'') in other complexes is indicated.

B Segmented maps for the indicated complexes showing 40S subunit (yellow), IRES (red), and eIF1A (blue) organized in a putative sequence showing the minimally bound state (structure 1<sub>ΔdII</sub>), fully opened binary complex containing  $\Delta$ dII IRES (structure 9<sub>ΔdII</sub>), binary complex containing the *wt* IRES (structure 10<sub>wt</sub>), and the eIF1A-containing ternary complex (structure 11<sub>wt</sub>).

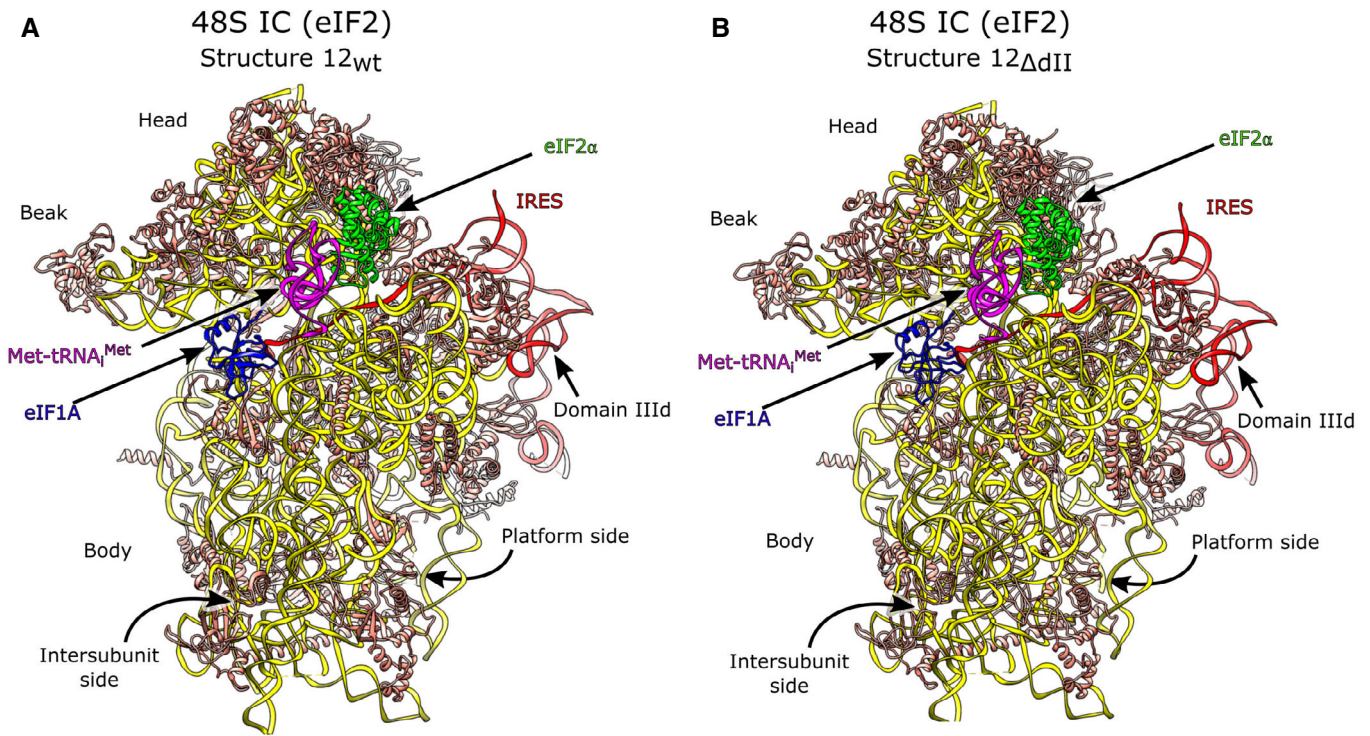

**Figure EV3. HCV IRES-eIF2-containing 48S initiation complexes.**

A, B Overview of (A) the *wt* IRES eIF2-containing 48S IC (structure 12<sub>wt</sub>) and (B) the  $\Delta$ dII IRES eIF2-containing 48S IC (structure 12 <sub>$\Delta$ dII</sub>).

**Figure EV4. The HCV IRES-eIF5B-containing 48S initiation complex.**

- A, B Overview of (A) the *wt* IRES eIF5B-containing pre-48S IC (structure 14<sub>wt</sub>) and (B) the *wt* IRES eIF5B-containing 48S IC (structure 15<sub>wt</sub>).
- C Global position of eIF5B bound to the intersubunit face of the 40S ribosomal subunit. Interactions between 18S rRNA (yellow), uS12 (salmon), and eIF1A (blue) are shown.
- D Position of eIF5B and tRNA in the 48S and 80S initiation complexes. Domains II, G, and III of eIF5B undergo relatively little movement between the 48S (green) and 80S stages (red), whereas domain IV translates and rotates (see E) causing movement in the tRNA between the two complexes (magenta and orange, respectively). Arrows show displacement for labeled domains or components between the eIF5B-containing 48S IC and the pre-elongation 80S ribosome.
- E The position of eIF5B domain IV in the 48S IC (green, left panel) would clash with 28S rRNA H89 and uL16 in the 60S subunit (left panel). To avoid this clash, in the 80S complex, domain IV (red, middle panel) translates by 6.4 Å toward the platform side of the 40S subunit and rotates by 30.9° causing the tRNA to rotate by 12.4° and translate by 6.4 Å toward the head (right panel).

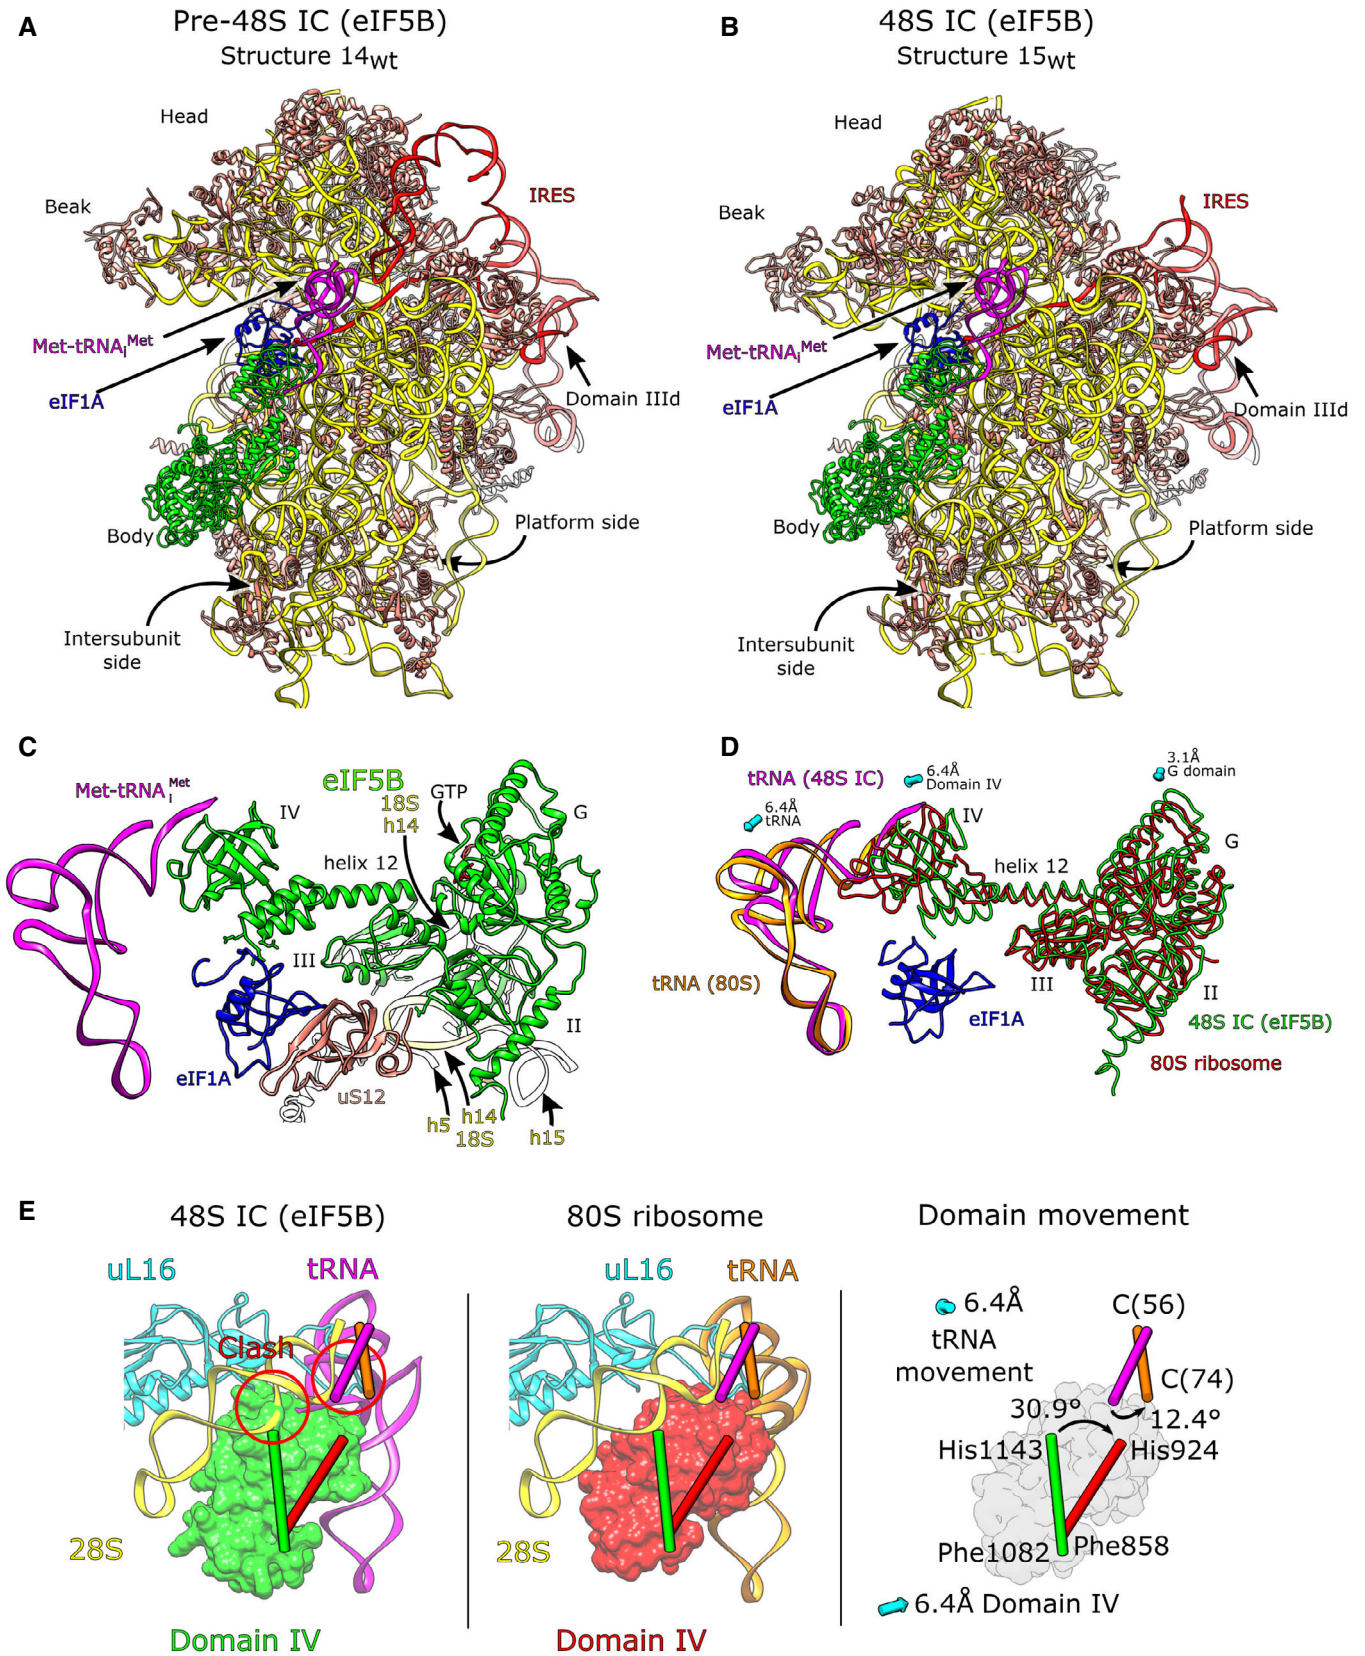

Figure EV4.
